# Supplementary material
Source: HighWire-hosted journal article supplement (https://wjps.bmj.com/content/3/3/e000187)
Supplement: inline-supplementary-material-2 [file inline-supplementary-material-2.pdf]

## Appendix

### Appendix 1: Survey Respondents by Country

| Country                              | Overall<br>(N=132) |
|--------------------------------------|--------------------|
| Afghanistan                          | 2 (1.5%)           |
| American Samoa                       | 1 (0.8%)           |
| Argentina                            | 4 (3.0%)           |
| Bangladesh                           | 1 (0.8%)           |
| Benin                                | 1 (0.8%)           |
| Brazil                               | 74 (56.1%)         |
| China                                | 1 (0.8%)           |
| Colombia                             | 2 (1.5%)           |
| The Democratic Republic of The Congo | 1 (0.8%)           |
| Egypt                                | 2 (1.5%)           |
| Ghana                                | 3 (2.3%)           |
| Haiti                                | 2 (1.5%)           |
| India                                | 4 (3.0%)           |
| Indonesia                            | 4 (3.0%)           |
| Kenya                                | 1 (0.8%)           |
| Malawi                               | 1 (0.8%)           |
| Malaysia                             | 1 (0.8%)           |
| Mexico                               | 3 (2.3%)           |
| Mozambique                           | 1 (0.8%)           |
| Nepal                                | 2 (1.5%)           |
| Nigeria                              | 7 (5.3%)           |
| Pakistan                             | 2 (1.5%)           |
| Papua New Guinea                     | 1 (0.8%)           |
| Philippines                          | 1 (0.8%)           |
| South Africa                         | 2 (1.5%)           |
| Sri Lanka                            | 1 (0.8%)           |
| United Republic of Tanzania          | 2 (1.5%)           |
| Uganda                               | 2 (1.5%)           |
| Viet Nam                             | 1 (0.8%)           |
| Zimbabwe                             | 2 (1.5%)           |
